# Supplementary material
Source: PubMed Central journal article supplement (PMC7964635)
Supplement: 3338_table.pdf [file 3338_table.pdf]

**On-line Table: Patient demographics and univariate associations with primary outcome**

|                                          | All Patients<br>(n = 28) | Met Combined<br>Outcome<br>(n = 18) | Did Not Meet<br>Combined Outcome<br>(n = 10) | P Value |
|------------------------------------------|--------------------------|-------------------------------------|----------------------------------------------|---------|
| Age (yr)                                 | 73 (59–82)               | 67 (58–83)                          | 75 (64–81)                                   | 1.000   |
| Sex (male)                               | 16 (57%)                 | 9 (50%)                             | 7 (70%)                                      | .434    |
| Medical history                          |                          |                                     |                                              |         |
| Anticoagulation                          | 2 (7%)                   | 1 (6%)                              | 1 (10%)                                      | 1.000   |
| Hypertension                             | 15 (54%)                 | 9 (50%)                             | 6 (60%)                                      | .705    |
| Other <sup>a</sup>                       | 8 (29%)                  | 6 (33%)                             | 2 (20%)                                      | .669    |
| Baseline NIHSS score                     | 18 (10–23)               | 22 (17–25)                          | 7 (2–13)                                     | .001    |
| Mean arterial blood pressure (mm Hg)     | 143 (116–178)            | 128 (113–165)                       | 164 (136–183)                                | .116    |
| Hemoglobin (g/L)                         | 137 (127–153)            | 135 (117–153)                       | 147 (138–153)                                | .195    |
| WBC ( $\times 10^9$ /L)                  | 8.6 (7.1–11.10)          | 9.1 (7.4–11.3)                      | 8.0 (6.4–9.7)                                | .230    |
| Platelets ( $\times 10^9$ /L)            | 221 (186–270)            | 244 (198–281)                       | 188 (180–237)                                | .146    |
| PTT (sec)                                | 29 (26–33)               | 30 (25–32)                          | 29 (28–33)                                   | .517    |
| INR                                      | 1.02 (0.97–1.12)         | 1.01 (0.94–1.12)                    | 1.02 (0.99–1.11)                             | .532    |
| Glucose (mmol/L)                         | 7.6 (6.3–9.9)            | 7.7 (7.0–10.0)                      | 6.1 (5.7–9.0)                                | .179    |
| Time from onset to CTA (min)             | 131 (86–181)             | 146 (87–190)                        | 126 (93–166)                                 | .920    |
| Time to follow-up NCCT (hr) <sup>b</sup> | 21.2 (14.6–23.9) n = 19  | 18.6 (10.8–21.5) n = 19             | 22.9 (19.5–23.9) n = 19                      | .297    |
| Location                                 |                          |                                     |                                              |         |
| Lobar                                    | 13 (46%)                 | 10 (56%)                            | 3 (30%)                                      | .254    |
| Deep                                     | 13 (46%)                 | 7 (39%)                             | 6 (60%)                                      | .433    |
| Infratentorial                           | 2 (7%)                   | 1 (6%)                              | 1 (10%)                                      | 1.000   |
| IVH                                      | 19 (68%)                 | 14 (78%)                            | 5 (50%)                                      | .210    |
| IVH Graeb score                          | 2.5 (0–5.5)              | 5 (2–8)                             | 1 (0–2)                                      | .022    |
| Initial hematoma volume (mL)             | 15.2 (3.7–101.6)         | 66.3 (13.4–122.2)                   | 3.0 (2.0–9.1)                                | .001    |
| uHG (mL/h)                               | 15.4 (1.8–34.3)          | 20.9 (8.6–41.2)                     | 2.5 (0.4–10.4)                               | .021    |
| Final hematoma volume (mL) <sup>b</sup>  | 10.8 (2.6–32.5) n = 19   | 23.5 (12.9–76.7) n = 9              | 3.0 (1.7–9.9) n = 10                         | .013    |
| Hematoma expansion (mL) <sup>b</sup>     | 0.1 (–0.6–6.6) n = 19    | 6.8 (0.2–8.3) n = 9                 | 0.0 (–0.80–0.13) n = 10                      | .053    |
| Hematoma expansion (%) <sup>b</sup>      | 5.0 (–7.6–36.4) n = 19   | 45.5 (5.0–68.0) n = 9               | 0.8 (–9.4–6.2) n = 10                        | .043    |
| CTA spot sign                            | 8 (29%)                  | 8 (44%)                             | 0 (0%)                                       | .025    |
| PCT spot sign                            | 9 (32%)                  | 9 (50%)                             | 0 (0%)                                       | .010    |
| CTP spot sign                            | 14 (50%)                 | 14 (78%)                            | 0 (0%)                                       | <.001   |

**Note:**—PTT indicates partial thromboplastin time; INR, international normalized ratio; uHG, ultra-early hematoma growth; WBC, white blood cell count.

<sup>a</sup> Other medical history includes previous stroke, diabetes, smoking, dyslipidemia, and alcohol abuse.

<sup>b</sup> Excluding patients who died prior to follow-up CT or had surgical hematoma evacuation.
